# Supplementary material for: Association between Triglyceride-Glucose Index and Early Neurological Outcomes after Thrombolysis in Patients with Acute Ischemic Stroke
Source: MDPI journal article supplement (doi:10.3390/jcm12103471), 2023-05-15
Supplement: s1 [file s1]

## Supplementary Materials

Table S1. Absolute risks for early neurological outcomes in different TyG index tertile groups.

Table S2. Association between TyG index and END<sub>2</sub>

Table S3. Association between TyG index and END<sub>4</sub>

Table S4. Association between TyG index and END<sub>2</sub> by limited to patients who did not receive thrombectomy treatment

Table S5. Association between TyG index and END<sub>4</sub> by limited to patients who did not receive thrombectomy treatment

Table S6. Association between TyG index and END<sub>2</sub> apart from sICH

Table S7. Association between TyG index and END<sub>4</sub> apart from sICH

Table S8. Differences in baseline characteristics in patients with and without ENI

Table S9. Association between TyG index and ENI

Table S10. Association between TyG index and ENI by limited to patients who did not receive thrombectomy treatment

Table S11. Baseline characteristics in patients with and without early sICH

Figure S1. Interactions between the TyG index and END or ENI.

Figure legend: A: END<sub>2</sub>; B: END<sub>4</sub>; C: ENI;

**Table S1. Absolute risks for early neurological outcomes in different TyG index tertile groups.**

| <b>TyG tertiles</b> | <b>With END<sub>2</sub></b> | <b>Without END<sub>2</sub></b> | <b>Total</b> | <b>Absolute risk</b> | <b>Absolute risk difference<br/>(95% CI %)</b> |
|---------------------|-----------------------------|--------------------------------|--------------|----------------------|------------------------------------------------|
| Lowest              | 21                          | 205                            | 226          | 9.3%                 | Ref                                            |
| Medium              | 21                          | 206                            | 227          | 9.3%                 | 0.4 (-3.9 to 4.8)                              |
| Highest             | 47                          | 176                            | 223          | 21.1%                | 11.8 (5.2 to 18.3);                            |
| <b>TyG tertiles</b> | <b>With END<sub>4</sub></b> | <b>Without END<sub>4</sub></b> | <b>Total</b> | <b>Absolute risk</b> | <b>Absolute risk difference<br/>(95% CI %)</b> |
| Lowest              | 13                          | 189                            | 226          | 5.8%                 | Ref                                            |
| Medium              | 14                          | 213                            | 227          | 6.2%                 | 0.4 (-3.9 to 4.8)                              |
| Highest             | 34                          | 213                            | 223          | 15.2%                | 9.5 (3.9 to 15.1)                              |
| <b>TyG tertiles</b> | <b>With ENI</b>             | <b>Without ENI</b>             | <b>Total</b> | <b>Absolute risk</b> | <b>Absolute risk difference<br/>95% CI (%)</b> |
| Lowest              | 171                         | 73                             | 226          | 75.5%                | Ref                                            |
| Medium              | 171                         | 56                             | 227          | 75.3%                | 0.35 (-7.6 to 8.3)                             |
| Highest             | 150                         | 55                             | 223          | 67.3%                | 0.4 (-3.9 to 4.8)                              |

Abbreviations: TyG = Triglyceride-glucose; END = Early neurological deterioration; ENI = Early neurological improvement; CI = confidence interval;

**Table S2. Association between TyG index and END<sub>2</sub>**

|                                  | <b>Model 3</b>          |         | <b>Model 4</b>   |         | <b>Model 5</b>          |         |
|----------------------------------|-------------------------|---------|------------------|---------|-------------------------|---------|
|                                  | OR (95% CI)             | p value | OR (95% CI)      | p value | OR (95% CI)             | p value |
| TyG index                        | <b>1.82 (1.32-2.51)</b> | <0.001  | 1.92 (1.39-2.66) | <0.001  | <b>1.92 (1.38-2.66)</b> | <0.001  |
| <b>TyG tertiles</b>              |                         | <0.001  |                  | <0.001  |                         | <0.001  |
| Lowest                           | Ref                     |         | Ref              |         | Ref                     |         |
| Medium                           | <b>1.00 (0.52-1.90)</b> |         | 1.04 (0.54-2.00) |         | <b>1.03 (0.53-1.99)</b> |         |
| Highest                          | <b>2.62 (1.49-4.62)</b> |         | 2.95 (1.65-5.26) |         | <b>2.88 (1.61-5.17)</b> |         |
| <b>TyG binary classification</b> |                         |         |                  |         |                         |         |
| Lowest to medium                 | Ref                     |         | Ref              |         | Ref                     |         |
| Highest                          | <b>2.63 (1.66-4.16)</b> | <0.001  | 2.89 (1.80-4.64) | <0.001  | <b>2.84 (1.77-4.58)</b> | <0.001  |

Model 3 = adjusted for age, sex, regular alcohol user, **previous stroke; coronary artery disease** and statin use;

Model 4 = adjusted for age, sex, hypertension, atrial fibrillation, coronary artery disease, initial NIHSS score;

Model 5 = adjusted for age, sex, regular alcohol user, statin use, atrial fibrillation, coronary artery disease, initial NIHSS score, and ASCO subtypes and previous stroke;

Abbreviations: TyG = The triglyceride-glucose; END = Early neurological deterioration; OR = odds ratios; CI = confidence interval; sICH = symptomatic intracerebral hemorrhage; NIHSS = National Institute of Health Stroke Scale; **ASCO: A (atherosclerosis) - S (small vessel disease) - C (cardioembolic)- O (other causes).**

**Table S3. Association between TyG index and END<sub>4</sub>**

|                                  | <b>Model 3</b>          |         | <b>Model 4</b>   |         | <b>Model 5</b>          |         |
|----------------------------------|-------------------------|---------|------------------|---------|-------------------------|---------|
|                                  | OR (95% CI)             | p value | OR (95% CI)      | p value | OR (95% CI)             | p value |
| TyG index                        | <b>1.93 (1.33-2.80)</b> | 0.001   | 2.07 (1.40-3.05) | <0.001  | <b>2.07 (1.39-3.07)</b> | <0.001  |
| <b>TyG tertiles</b>              |                         | 0.001   |                  | <0.001  |                         | <0.001  |
| Lowest                           | Ref                     |         | Ref              |         | Ref                     |         |
| Medium                           | <b>1.12 (0.51-2.47)</b> |         | 1.26 (0.55-2.85) |         | <b>1.19 (0.53-2.70)</b> |         |
| Highest                          | <b>3.11 (1.57-6.16)</b> |         | 3.87 (1.88-7.94) |         | <b>3.65 (1.78-7.49)</b> |         |
| <b>TyG binary classification</b> |                         |         |                  |         |                         |         |
| Lowest to medium                 | Ref                     |         | Ref              |         | Ref                     |         |
| Highest                          | <b>2.93 (1.70-5.05)</b> | <0.001  | 3.44 (1.94-6.11) | <0.001  | <b>3.34 (1.88-5.94)</b> | <0.001  |

Model 3=adjusted for age, sex, regular alcohol user, **previous stroke; coronary artery disease** and statin use;

Model 4=adjusted for age, sex, hypertension, atrial fibrillation, coronary artery disease, initial NIHSS score;

Model 5=adjusted for age, sex, regular alcohol user, **previous stroke**, statin use, atrial fibrillation, coronary artery disease, initial NIHSS score, and ASCO subtypes;

Abbreviations: TyG = Triglyceride-glucose; END = Early neurological deterioration; OR = odds ratios; CI = confidence interval; sICH = symptomatic intracerebral hemorrhage; NIHSS = National Institute of Health Stroke Scale; **ASCO: A (atherosclerosis) - S (small vessel disease) - C (cardioembolic)- O (other causes).**

**Table S4. Association between TyG index and END<sub>2</sub> by limited to patients who did not receive thrombectomy treatment**

|                                  | Unadjusted       |         | Model 1          |         | Model 2          |         | Model 3          |         | Model 4          |         | Model 5          |         |
|----------------------------------|------------------|---------|------------------|---------|------------------|---------|------------------|---------|------------------|---------|------------------|---------|
|                                  | OR (95% CI)      | p value |
| TyG index                        | 1.63 (1.14-2.34) | 0.008   | 1.74 (1.19-2.55) | 0.004   | 1.72 (1.00-1.06) | 0.004   | 1.68 (1.15-2.44) | 0.007   | 1.74 (1.20-2.54) | 0.004   | 1.73 (1.18-2.53) | 0.005   |
| <b>TyG tertiles</b>              |                  | 0.044   |                  | 0.029   |                  | 0.033   |                  | 0.049   |                  | 0.025   |                  | 0.035   |
| Lowest                           | Ref              |         |
| Medium                           | 1.01 (0.49-2.08) |         | 1.02 (0.48-2.15) |         | 1.08 (0.52-2.23) |         | 0.98 (0.47-2.05) |         | 1.00 (0.48-2.09) |         | 0.98 (0.47-2.08) |         |
| Highest                          | 1.99 (1.04-3.80) |         | 2.14 (1.09-4.20) |         | 2.14 (1.11-4.12) |         | 1.96 (1.01-3.79) |         | 2.14 (1.10-4.17) |         | 2.07 (1.05-4.06) |         |
| <b>TyG binary classification</b> |                  |         |                  |         |                  |         |                  |         |                  |         |                  |         |
| Lowest to medium                 | Ref              |         |
| Highest                          | 1.98 (1.16-3.38) | 0.013   | 1.12 (1.22-3.70) | 0.008   | 2.06 (1.20-3.55) | 0.009   | 1.98 (1.15-3.40) | 0.014   | 2.15 (1.24-3.72) | 0.007   | 2.09 (1.20-3.64) | 0.010   |

Model 1=adjusted for age, sex, atrial fibrillation, coronary artery disease, initial NIHSS score, ASCO subtypes, and previous stroke;

Model 2=adjusted for the minimally sufficient adjustment sets using a directed acyclic graph: age, sex, current smoker, regular alcohol user;

Model 3 = adjusted for age, sex, regular alcohol user, **previous stroke; coronary artery disease** and statin use;

Model 4 = adjusted for age, sex, hypertension, atrial fibrillation, coronary artery disease, initial NIHSS score;

Model 5 = adjusted for age, sex, regular alcohol user, statin use, atrial fibrillation, coronary artery disease, initial NIHSS score, and ASCO subtypes and previous stroke;

Abbreviations: TyG = Triglyceride-glucose; END = Early neurological deterioration; OR = odds ratios; CI = confidence interval; sICH = symptomatic intracerebral

hemorrhage; NIHSS = National Institute of Health Stroke Scale; ASCO: A (atherosclerosis) - S (small vessel disease) - C (cardioembolic)- O (other causes).

**Table S5. Association between TyG index and END<sub>4</sub> by limited to patients who did not receive thrombectomy treatment**

|                                  | Unadjusted       |         | Model 1          |         | Model 2          |         | Model 3          |         | Model 4          |         | Model 5          |         |
|----------------------------------|------------------|---------|------------------|---------|------------------|---------|------------------|---------|------------------|---------|------------------|---------|
|                                  | OR (95% CI)      | p value |
| TyG index                        | 1.62 (1.04-2.54) | 0.034   | 1.78 (1.10-2.88) | 0.019   | 1.72 (1.19-2.48) | 0.004   | 1.76 (1.10-2.83) | 0.019   | 1.78 (1.10-2.87) | 0.018   | 1.79 (1.10-2.91) | 0.02    |
| <b>TyG tertiles</b>              |                  | 0.182   |                  | 0.119   |                  | 0.033   |                  | 0.166   |                  | 0.174   |                  | 0.139   |
| Lowest                           | Ref              |         |
| Medium                           | 1.13 (0.45-2.84) |         | 1.21 (0.46-3.18) |         | 1.08 (0.52-2.23) |         | 1.11 (0.44-2.85) |         | 1.21 (0.47-3.11) |         | 1.19 (0.45-3.13) |         |
| Highest                          | 2.01 (0.87-4.62) |         | 2.32 (0.96-5.60) |         | 2.14 (1.11-4.12) |         | 2.06 (0.88-4.83) |         | 2.12 (0.90-5.00) |         | 2.25 (0.93-5.44) |         |
| <b>TyG binary classification</b> |                  |         |                  |         |                  |         |                  |         |                  |         |                  |         |
| Lowest to medium                 | Ref              |         |
| Highest                          | 1.89 (0.96-3.72) | 0.067   | 2.11 (1.03-4.32) | 0.042   | 2.06 (1.20-3.55) | 0.009   | 1.94 (0.97-3.88) | 0.059   | 2.12 (1.04-4.32) | 0.04    | 2.06 (1.00-4.23) | 0.050   |

Model 1=adjusted for age, sex, atrial fibrillation, coronary artery disease, initial NIHSS score, ASCO subtypes;

Model 2=adjusted for the minimally sufficient adjustment sets using a directed acyclic graph: age, sex, current smoker, regular alcohol user;

Model 3=adjusted for age, sex, regular alcohol user, **previous stroke; coronary artery disease** and statin use;

Model 4=adjusted for age, sex, hypertension, atrial fibrillation, coronary artery disease, initial NIHSS score;

Model 5=adjusted for age, sex, regular alcohol user, previous stroke, statin use, atrial fibrillation, coronary artery disease, initial NIHSS score, and ASCO subtypes;

Abbreviations: TyG = Triglyceride-glucose; END = Early neurological deterioration; OR = odds ratios; CI = confidence interval; sICH = symptomatic intracerebral hemorrhage; NIHSS = National Institute of Health Stroke Scale; ASCO: A (atherosclerosis) - S (small vessel disease) - C (cardioembolic)- O (other causes).



**Table S6. Association between TyG index and END<sub>2</sub> apart from sICH**

|                                  | Unadjusted       |         | Model 1          |         | Model 2          |         | Model 3          |         | Model 4          |         | Model 5          |         |
|----------------------------------|------------------|---------|------------------|---------|------------------|---------|------------------|---------|------------------|---------|------------------|---------|
|                                  | OR (95% CI)      | p value |
| TyG index                        | 1.76 (1.23-2.52) | 0.002   | 1.80 (1.23-2.62) | 0.002   | 1.79 (1.24-2.58) | 0.002   | 1.74 (1.20-2.51) | 0.003   | 1.85 (1.27-2.70) | 0.001   | 1.81 (1.23-2.64) | 0.002   |
| <b>TyG tertiles</b>              |                  | 0.002   |                  | 0.003   |                  | 0.002   |                  | 0.003   |                  | 0.002   |                  | 0.003   |
| Lowest                           | Ref              |         |
| Medium                           | 1.41 (0.66-3.03) |         | 1.42 (0.65-3.10) |         | 1.48 (0.69-3.19) |         | 1.39 (0.64-3.02) |         | 1.41 (0.65-3.06) |         | 1.41 (0.64-3.09) |         |
| Highest                          | 3.11 (1.55-6.21) |         | 3.16 (1.54-6.50) |         | 3.26 (1.61-6.59) |         | 3.03 (1.49-6.15) |         | 3.25 (1.59-6.64) |         | 3.15 (1.53-6.47) |         |
| <b>TyG binary classification</b> |                  |         |                  |         |                  |         |                  |         |                  |         |                  |         |
| Lowest to medium                 | Ref              |         |
| Highest                          | 2.58 (1.51-4.39) | <0.001  | 2.60 (1.49-4.53) | 0.001   | 2.63 (1.53-4.52) | <0.001  | 2.52 (1.47-4.33) | 0.001   | 2.69 (1.56-4.66) | <0.001  | 2.60 (1.49-4.53) | 0.001   |

Model 1=adjusted for age, sex, atrial fibrillation, coronary artery disease, initial NIHSS score, ASCO subtypes, and previous stroke;

Model 2=adjusted for the minimally sufficient adjustment sets using a directed acyclic graph: age, sex, current smoker, regular alcohol user;

Model 3 = adjusted for age, sex, regular alcohol user, **previous stroke; coronary artery disease** and statin use;

Model 4 = adjusted for age, sex, hypertension, atrial fibrillation, coronary artery disease, initial NIHSS score;

Model 5 = adjusted for age, sex, regular alcohol user, statin use, atrial fibrillation, coronary artery disease, initial NIHSS score, and ASCO subtypes and previous stroke;

Abbreviations: TyG = Triglyceride-glucose; END = Early neurological deterioration; OR = odds ratios; CI = confidence interval; sICH = symptomatic intracerebral

hemorrhage; NIHSS = National Institute of Health Stroke Scale; ASCO: A (atherosclerosis) - S (small vessel disease) - C (cardioembolic)- O (other causes).

**Table S7. Association between TyG index and END<sub>4</sub> apart from sICH**

|                                  | Unadjusted        |         | Model 1            |         | Model 2          |         | Model 3           |         | Model 4           |         | Model 5           |         |
|----------------------------------|-------------------|---------|--------------------|---------|------------------|---------|-------------------|---------|-------------------|---------|-------------------|---------|
|                                  | OR (95% CI)       | p value | OR (95% CI)        | p value | OR (95% CI)      | p value | OR (95% CI)       | p value | OR (95% CI)       | p value | OR (95% CI)       | p value |
| TyG index                        | 1.85 (1.17-2.93)  | 0.009   | 2.05 (1.25 -3.36)  | 0.005   | 1.79 (1.24-2.58) | 0.002   | 1.91 (1.19-3.07)  | 0.007   | 2.09 (1.28-3.42)  | 0.003   | 2.06 (1.25-3.38)  | 0.005   |
| <b>TyG tertiles</b>              |                   | 0.006   |                    | 0.002   |                  | 0.002   |                   | 0.005   |                   | 0.002   |                   | 0.002   |
| Lowest                           | Ref               |         | Ref                |         | Ref              |         | Ref               |         | Ref               |         | Ref               |         |
| Medium                           | 2.50 (0.77-8.10)  |         | 2.64 (0.79-8.80)   |         | 1.48 (0.69-3.19) |         | 2.60 (0.79-8.52)  |         | 2.87 (0.86-9.60)  |         | 2.72 (0.81-9.07)  |         |
| Highest                          | 5.35 (1.79-16.02) |         | 6.87 (2.19- 21.52) |         | 3.26 (1.61-6.59) |         | 5.61 (1.85-17.04) |         | 6.95 (2.23-21.73) |         | 6.55 (2.11-20.34) |         |
| <b>TyG binary classification</b> |                   |         |                    |         |                  |         |                   |         |                   |         |                   |         |
| Lowest to medium                 | Ref               |         | Ref                |         | Ref              |         | Ref               |         | Ref               |         | Ref               |         |
| Highest                          | 3.06 (1.50-6.23)  | 0.002   | 3.60 (1.71-7.58)   | 0.001   | 2.63 (1.53-4.52) | <0.001  | 3.12 (1.52-6.43)  | 0.002   | 3.65 (1.73-7.71)  | 0.001   | 3.57 (1.69-7.53)  | 0.001   |

Model 1=adjusted for age, sex, atrial fibrillation, coronary artery disease, initial NIHSS score, ASCO subtypes;

Model 2=adjusted for the minimally sufficient adjustment sets using a directed acyclic graph: age, sex, current smoker, regular alcohol user;

Model 3=adjusted for age, sex, regular alcohol user, previous stroke; coronary artery disease and statin use;

Model 4=adjusted for age, sex, hypertension, atrial fibrillation, coronary artery disease, initial NIHSS score;

Model 5=adjusted for age, sex, regular alcohol user, previous stroke, statin use, atrial fibrillation, coronary artery disease, initial NIHSS score, and ASCO subtypes;

Abbreviations: TyG = Triglyceride-glucose; END = Early neurological deterioration; OR = odds ratios; CI = confidence interval; sICH = symptomatic intracerebral

hemorrhage; NIHSS = National Institute of Health Stroke Scale; ASCO: A (atherosclerosis) - S (small vessel disease) - C (cardioembolic)- O (other causes).

**Table S8. Differences in baseline characteristics in patients with and without ENI**

| Variable                           | Without ENI<br>(n = 184) | With ENI<br>(n = 492) | P Value |
|------------------------------------|--------------------------|-----------------------|---------|
| <b>Demographic characteristics</b> |                          |                       |         |
| Age, y, median (IQR)               | 69 (63-76)               | 68 (59-75)            | 0.053   |
| Sex, n (%)                         |                          |                       | 0.519   |
| Male, n (%)                        | 114 (62.0)               | 318 (64.6)            |         |
| Female, n (%)                      | 70 (38.0)                | 174 (35.4)            |         |
| <b>Vascular risk factors</b>       |                          |                       |         |
| Current smoker, n (%)              | 40 (21.7)                | 158 (32.1)            | 0.008   |
| Regular alcohol user, n (%)        | 15 (8.2)                 | 47 (9.6)              | 0.574   |
| Previous stroke, n (%)             | 25 (13.6)                | 77 (15.7)             | 0.505   |
| Hypertension, n (%)                | 130 (70.7)               | 318 (64.6)            | 0.141   |
| Diabetes, n (%)                    | 41 (22.3)                | 101 (20.5)            | 0.618   |
| Dyslipidemia, n (%)                | 65 (35.3)                | 141 (28.9)            | 0.105   |
| Atrial fibrillation, n (%)         | 71 (38.6)                | 139 (28.3)            | 0.010   |
| Coronary artery disease, n (%)     | 26 (14.1)                | 55 (11.2)             | 0.293   |
| <b>Medication use history</b>      |                          |                       |         |
| Previous antiplatelet, n (%)       | 25 (13.6)                | 50 (10.2)             | 0.207   |
| Previous anticoagulants, n (%)     | 4 (2.2)                  | 10 (2.0)              | 0.909   |
| Previous statin, n (%)             | 14 (7.6)                 | 36 (7.3)              | 0.897   |
| Previous antihypertension, n (%)   | 75 (40.8)                | 189 (38.4)            | 0.578   |

|                                     |                     |                     |        |
|-------------------------------------|---------------------|---------------------|--------|
| Previous hypoglycemic agents, n (%) | 25 (13.6)           | 56 (11.4)           | 0.432  |
| <b>Clinical assessment</b>          |                     |                     |        |
| Initial NIHSS score, median (IQR)   | 5 (2-12)            | 7 (4-12)            | <0.001 |
| Discharge NIHSS score, median (IQR) | 5 (2-15)            | 4 (2-10)            | 0.041  |
| SBP, mmHg, mean $\pm$ SD            | 153 $\pm$ 23        | 147 $\pm$ 22        | 0.013  |
| DBP, mmHg, median (IQR)             | 90 (80-100)         | 80 (88-98)          | 0.033  |
| OTT, minute, median (IQR)           | 180 (136-220)       | 180 (120.0-210)     | 0.050  |
| Thrombectomy treatment, n (%)       | 22 (12.0)           | 71 (14.4)           | 0.406  |
| 24hours sICH, n (%)                 | 18 (9.8)            | 10 (2.0)            | <0.001 |
| Any ICH, n (%)                      | 40 (21.7)           | 87 (17.7)           | 0.229  |
| <b>ASCO Stroke subtype</b>          |                     |                     | 0.400  |
| Atherosclerosis, n (%)              | 68 (37.0)           | 182 (37.0)          |        |
| Cardioembolic, n (%)                | 64 (34.8)           | 147 (29.9)          |        |
| Small vessel disease, n (%)         | 14 (20.7)           | 107 (21.7)          |        |
| Other causes, n (%)                 | 38 (7.6)            | 56 (11.4)           |        |
| <b>Laboratory data</b>              |                     |                     |        |
| FBG, mg/dl, median (IQR)            | 108.1 (91.2-141.6)  | 101.4 (87.2-119.6)  | 0.001  |
| TG, mg/dl, median (IQR)             | 103.6 (72.6-142.5)  | 97.0 (69.1-145.3)   | 0.512  |
| TC, mg/dl, median (IQR)             | 175.4 (147.7-207.1) | 172.8 (142.0-198.0) | 0.133  |
| LDL, mg/dl, median (IQR)            | 118.6 (92.6-144.8)  | 111.7 (85.9-138.4)  | 0.043  |
| TyG index, mean $\pm$ SD            | 8.71 $\pm$ 0.71     | 8.58 $\pm$ 0.69     | 0.025  |
| <b>TyG tertiles</b>                 |                     |                     | 0.077  |

|                |           |            |
|----------------|-----------|------------|
| Lowest, n (%)  | 55 (29.9) | 171 (34.8) |
| Medium, n (%)  | 56 (30.4) | 171 (34.8) |
| Highest, n (%) | 73 (39.7) | 150 (30.5) |

---

Abbreviations: ENI = Early neurological improvement; IQR = Interquartile range; NIHSS = National Institute of Health Stroke Scale; SBP = systolic blood pressure; SD = Standard deviation; DBP = diastolic blood pressure; OTT = onset to treatment time; sICH = symptomatic intracerebral hemorrhage; ICH = intracerebral hemorrhage; FBG = fasting blood glucose; TG = triglyceride; TC = total cholesterol; LDL = low-density lipoprotein; TyG = Triglyceride-glucose

**Table S9. Association between TyG index and ENI**

|                           | Unadjusted       |         | Model 1          |         | Model 2          |         | Model 3          |         | Model 4          |         | Model 5          |         |
|---------------------------|------------------|---------|------------------|---------|------------------|---------|------------------|---------|------------------|---------|------------------|---------|
|                           | OR (95% CI)      | p value |
| TyG index                 | 0.78 (0.61-0.99) | 0.04    | 0.73 (0.56-0.94) | 0.015   | 0.74 (0.57-0.94) | 0.015   | 0.76 (0.59-0.97) | 0.025   | 0.76 (0.59-0.97) | 0.027   | 0.74 (0.57-0.95) | 0.019   |
| <b>TyG tertiles</b>       |                  | 0.079   |                  | 0.022   |                  | 0.049   |                  | 0.065   |                  | 0.061   |                  | 0.052   |
| Lowest                    | Ref              |         |
| Medium                    | 0.98 (0.64-1.51) |         | 1.00 (0.63-1.58) |         | 0.96 (0.62-1.47) |         | 0.95 (0.62-1.47) |         | 0.97 (0.63-1.50) |         | 0.98 (0.63-1.54) |         |
| Highest                   | 0.66 (0.44-1.00) |         | 0.59 (0.38-0.92) |         | 0.63 (0.41-0.95) |         | 0.64 (0.42-0.97) |         | 0.64 (0.42-0.97) |         | 0.63 (0.41-0.97) |         |
| TyG binary classification |                  |         |                  |         |                  |         |                  |         |                  |         |                  |         |
| Lowest to medium          | Ref              |         |
| Highest                   | 0.67 (0.47-0.95) | 0.024   | 0.59 (0.41-0.86) | 0.006   | 0.64 (0.45-0.92) | 0.014   | 0.65 (0.46-0.94) | 0.020   | 0.65 (0.45-0.93) | 0.018   | 0.63 (0.44-0.92) | 0.015   |

Model 1=adjusted for age, sex, initial NIHSS score, Current smoker, atrial fibrillation, SBP, DBP, OTT;

Model 2=adjusted for the minimally sufficient adjustment sets using a directed acyclic graph: age, sex, current smoker, regular alcohol user;

Model 3=adjusted for age, sex, regular alcohol user, previous stroke, coronary artery disease and statin use;



Model 4=adjusted for age, sex, hypertension, atrial fibrillation, coronary artery disease, initial NIHSS score;

Model 5=adjusted for age, sex, initial NIHSS score, current smoker, atrial fibrillation, SBP, DBP, OTT, regular alcohol user, previous stroke, coronary artery disease and statin use;

Abbreviations: TyG = Triglyceride-glucose; ENI = Early neurological improvement; OR = odds ratios; CI = confidence interval; NIHSS = National Institute of Health Stroke Scale.

**Table S10. Association between TyG index and ENI by limited to patients who did not receive thrombectomy treatment**

|                                  | Unadjusted       |         | Model 1          |         | Model 2          |         | Model 3          |         | Model 4          |         | Model 5          |         |
|----------------------------------|------------------|---------|------------------|---------|------------------|---------|------------------|---------|------------------|---------|------------------|---------|
|                                  | OR (95% CI)      | p value |
| TyG index                        | 0.81 (0.63-1.05) | 0.114   | 0.75 (0.57-0.99) | 0.042   | 0.78 (0.60-1.01) | 0.062   | 0.79 (0.61-1.02) | 0.076   | 0.79 (0.60-1.03) | 0.076   | 0.78 (0.60-1.03) | 0.079   |
| <b>TyG tertiles</b>              |                  | 0.229   |                  | 0.08    |                  | 0.184   |                  | 0.178   |                  | 0.164   |                  | 0.203   |
| Lowest                           | Ref              |         |
| Medium                           | 0.87 (0.56-1.40) |         | 0.96 (0.59-1.56) |         | 0.88 (0.55-1.39) |         | 0.85 (0.54-1.35) |         | 0.88 (0.56-1.41) |         | 0.92 (0.57-1.49) |         |
| Highest                          | 0.69 (0.44-1.07) |         | 0.62 (0.38-0.99) |         | 0.66 (0.42-1.04) |         | 0.66 (0.42-1.03) |         | 0.65 (0.41-1.03) |         | 0.67 (0.42-1.08) |         |
| <b>TyG binary classification</b> |                  |         |                  |         |                  |         |                  |         |                  |         |                  |         |
| Lowest to medium                 | Ref              |         |
| Highest                          | 0.73 (0.50-1.06) | 0.101   | 0.70 (0.47-1.04) | 0.079   | 0.71 (0.48-1.04) | 0.079   | 0.71 (0.49-1.04) | 0.08    | 0.70 (0.47-1.03) | 0.067   | 0.70 (0.47-1.04) | 0.079   |

Model 1=adjusted for age, sex, initial NIHSS score, Current smoker, atrial fibrillation, SBP, DBP, OTT;

Model 2=adjusted for the minimally sufficient adjustment sets using a directed acyclic graph: age, sex, Current smoker, regular alcohol user;

Model 3=adjusted for age, sex, regular alcohol user, previous stroke, coronary artery disease and statin use;

Model 4=adjusted for age, sex, hypertension, atrial fibrillation, coronary artery disease, initial NIHSS score;

Model 5=adjusted for age, sex, initial NIHSS score, current smoker, atrial fibrillation, SBP, DBP, OTT, regular alcohol user, previous stroke, coronary artery disease and statin use;

Abbreviations: TyG = Triglyceride-glucose; ENI = Early neurological improvement; OR = odds ratios; CI = confidence interval; NIHSS = National Institute of Health Stroke Scal; SBP = systolic blood pressure; DBP = diastolic blood pressure, OTT = onset to treatment time; ASCO: A (atherosclerosis) - S (small vessel disease) - C (cardioembolic)- O (other causes).

**Table S11. Baseline characteristics in patients with and without early sICH**

| Variable                            | With sICH (n=28) | Without sICH (n=648) | P Value |
|-------------------------------------|------------------|----------------------|---------|
| <b>Demographic characteristics</b>  |                  |                      |         |
| Age, y, median (IQR)                | 73 (68-80)       | 68 (59-75)           | 0.003   |
| Sex, n (%)                          |                  |                      | 0.447   |
| Male, n (%)                         | 16 (57.1)        | 418 (64.2)           |         |
| Female, n (%)                       | 12 (42.9)        | 232 (35.8)           |         |
| <b>Vascular risk factors</b>        |                  |                      |         |
| Current smoker, n (%)               | 4 (14.3)         | 194 (29.9)           | 0.075   |
| Regular alcohol user, n (%)         | 2 (7.1)          | 60 (9.3)             | 0.704   |
| Previous stroke, n (%)              | 4 (14.3)         | 98 (15.1)            | 0.903   |
| Hypertension, n (%)                 | 22 (78.6)        | 426 (65.7)           | 0.160   |
| Diabetes, n (%)                     | 12 (42.9)        | 130 (20.1)           | 0.004   |
| Dyslipidemia, n (%)                 | 5 (17.9)         | 202 (31.2)           | 0.134   |
| Atrial fibrillation, n (%)          | 20 (71.4)        | 190 (29.3)           | <0.001  |
| Coronary artery disease, n (%)      | 6 (21.4)         | 75 (11.6)            | 0.202   |
| <b>Medication use history</b>       |                  |                      |         |
| Previous antiplatelet, n (%)        | 3 (10.7)         | 72 (11.1)            | 1.000   |
| Previous anticoagulants, n (%)      | 1 (3.6)          | 13 (2.0)             | 0.450   |
| Previous statin, n (%)              | 1 (3.6)          | 49 (7.6)             | 0.674   |
| Previous antihypertension, n (%)    | 10 (35.7)        | 254 (39.2)           | 0.711   |
| Previous hypoglycemic agents, n (%) | 7 (25.0)         | 74 (11.4)            | 0.062   |

|                                     |                     |                     |        |
|-------------------------------------|---------------------|---------------------|--------|
| <b>Clinical assessment</b>          |                     |                     |        |
| Initial NIHSS score, median (IQR)   | 12 (9-17)           | 6 (3-12)            | <0.001 |
| Discharge NIHSS score, median (IQR) | 16 (9-36)           | 2 (1-6)             | <0.001 |
| SBP, mmHg, mean±SD                  | 152±30              | 149±22              | 0.882  |
| DBP, mmHg, median (IQR)             | 85 (77-99)          | 89 (80-98)          | 0.696  |
| OTT, minute ,median (IQR)           | 163 (120-200)       | 180 (120-210)       | 0.467  |
| Thrombectomy treatment, n (%)       | 12 (42.9)           | 81 (12.5)           | <0.001 |
| <b>ASCO Stroke subtype</b>          |                     |                     | <0.001 |
| Atherosclerosis, n (%)              | 8 (28.6)            | 242 (37.3)          |        |
| Cardioembolic, n (%)                | 19 (67.9)           | 192 (29.6)          |        |
| Small vessel disease, n (%)         | 1 (3.6)             | 69 (10.6)           |        |
| Other causes, n (%)                 | 0 (0)               | 145 (22.4)          |        |
| <b>Laboratory data</b>              |                     |                     |        |
| FBG, mg/dl, median (IQR)            | 143.3 (11.2-204.2)  | 101.6 (88.3-122.1)  | <0.001 |
| TG, mg/dl, median (IQR)             | 86.3 (64.6-127.9)   | 100.1 (70.0-145.3)  | 0.287  |
| TC, mg/dl, median (IQR)             | 146.2 (181.0-204.8) | 173.2 (143.9-200.5) | 0.485  |
| LDL, mg/dl, median (IQR)            | 121.4 (94.9-142.3)  | 113.3 (87.0-138.8)  | 0.222  |
| TyG index, mean±SD                  | 8.87±0.69           | 8.61±0.70           | 0.064  |
| <b>TyG tertiles</b>                 |                     |                     | 0.030  |
| Lowest, n (%)                       | 9 (32.1)            | 217 (33.5)          |        |
| Medium, n (%)                       | 4 (14.3)            | 223 (34.4)          |        |
| Highest, n (%)                      | 15 (53.6)           | 208 (32.1)          |        |

Abbreviations: sICH = symptomatic intracerebral hemorrhage; IQR = Interquartile range; NIHSS = National Institute of Health Stroke Scale; SBP = systolic blood pressure; SD = Standard deviation; DBP = diastolic blood pressure; OTT = onset to treatment time; FBG = fasting blood glucose; TG = triglyceride; TC = total cholesterol; LDL = low-density lipoprotein; TyG = Triglyceride-glucose

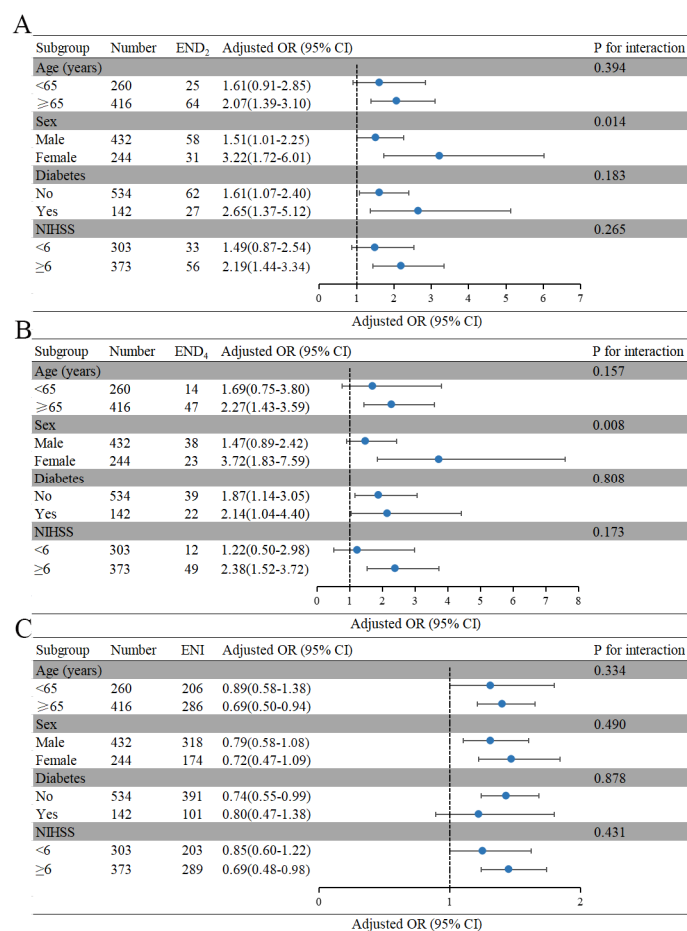

**Figure S1. Interactions between the TyG index and END/ENI. Figure legend: A: END<sub>2</sub>; B: END<sub>4</sub>; C: ENI;**

Adjusted for age, sex, hypertension, atrial fibrillation, coronary artery disease, initial NIHSS score.

Abbreviations: END = Early neurological deterioration; ENI = Early neurological improvement; TyG = Triglyceride-glucose; NIHSS = National Institute of Health Stroke Scale; OR = odds ratios; CI = confidence interval;
